# Supplementary material
Source: publisher figshare collection journal article supplement (https://karger.figshare.com/ndownloader/files/23581871)
Supplement: Supplementary file 1 [file 23581871]

Supplementary Table. 1. Sequences of target specific siRNAs

| **Gene** | **siRNA** | **Sequence (5’→3’)** |
| --- | --- | --- |
| human SEMA3C | siRNA #1 (sense) | GGAGGAGAUCAGAGGACCA |
| siRNA #1 (antisense) | UGGUCCUCUGAUCUCCUCC |
| siRNA #2 (sense) | AGUGGUUGUUCUUCCUACU |
| siRNA #2 (antisense) | AGUAGGAAGAACAACCACU |
| human PLXNA2 | siRNA #1 (sense) | CUGUGUAUUGGCGAGUGUA |
| siRNA #1 (antisense) | UACACUCGCCAAUACACAG |
| siRNA #2 (sense) | GAGUGAUGCUCCUGAUCUA |
| siRNA #2 (antisense) | UAGAUCAGGAGCAUCACUC |
| human PLXNB1 | siRNA #1 (sense) | CAGAUACCCAGUGCCAUGU |
| siRNA #1 (antisense) | ACAUGGCACUGGGUAUCUG |
| siRNA #2 (sense) | CACUGAACUCCGCCCAUCU |
| siRNA #2 (antisense) | AGAUGGGCGGAGUUCAGUG |
| human PLXND1 | siRNA #1 (sense) | CACACAGAGCUACAUCCUU |
| siRNA #1 (antisense) | AAGGAUGUAGCUCUGUGUG |
| siRNA #2 (sense) | CGAGUGAAAGACUUGGACA |
| siRNA #2 (antisense) | UGUCCAAGUCUUUCACUCG |
